# Supplementary material
Source: publisher site journal article supplement (https://www.spandidos-publications.com/4973/downloadSupplementary)
Supplement: Supplementary file 1 [file downloadSupplementary]

## Sheet: African-American
Table SI. Mutation summary in samples.
Tumor_Internal_ID	Subtype	Frame_Shift_Del	Frame_Shift_Ins	In_Frame_Del	In_Frame_Ins	Missense_Mutation	Nonsense_Mutation	Splice_Site	Total
63T	Luminal A	2	1	7	2	97	2	2	113
44T	Luminal A	3	3	3	1	49	5	2	66
141T	TNBC	4	5	3	2	42	2	3	61
174T	Luminal A	2	2	9	2	33	2	2	52
151T	Unknown	5	2	4	4	31	1	1	48
173T	Luminal A	7	3	7	3	28	0	0	48
74T	Luminal A	5	1	4	8	25	0	1	44
12T	TNBC	7	2	2	6	24	0	1	42
35T	TNBC	4	1	5	9	22	0	0	41
13T	Luminal A	2	1	6	9	12	1	2	33
147T	Her2	5	2	0	4	21	0	1	33
14T	Luminal A	3	0	3	9	18	0	0	33
6T	Luminal A	6	1	2	1	23	0	0	33
Total samples, 13; total number of genes, 538. Frame_Shift_Del: 55 (Total); 4.231 (Mean); 4 (Median). Frame_Shift_Ins: 24 (Total); 1.846 (Mean); 2 (Median). In_Frame_Del: 55 (Total); 4.231 (Mean); 4 (Median). In_Frame_Ins: 60 (Total); 4.615 (Mean); 4 (Median). Missense_Mutation: 425 (Total); 32.692 (Mean); 25 (Median). Nonsense_Mutation: 13 (Total); 1 (Mean); 0 (Median). Splice_Site: 15 (Total); …

## Sheet: Hispanic
Table SI. Mutation summary in samples.
Tumor_Internal_ID	Subtype	Frame_Shift_Del	Frame_Shift_Ins	In_Frame_Del	In_Frame_Ins	Missense_Mutation	Nonsense_Mutation	Nonstop_Mutation	Splice_Site	Translation_Start_Site	Total
68T	Her2	3	1	1	0	47	0	1	2	1	56
22T	Luminal A	1	0	3	3	41	1	1	1	0	51
17T	Her2	1	1	0	1	44	3	0	0	0	50
161T	TNBC	1	0	6	3	35	2	0	0	0	47
66T	TNBC	2	1	6	4	32	0	0	1	0	46
170T	Luminal B	2	0	4	3	33	0	0	3	0	45
171T	Luminal A	4	1	7	2	28	1	0	1	0	44
24T	Luminal A	3	1	2	1	31	1	0	1	0	40
3T	Her2	3	0	1	3	30	3	0	0	0	40
140T	TNBC	3	1	2	3	26	1	0	1	0	37
50T	Luminal A	1	1	2	5	27	1	0	0	0	37
149T	Luminal A	3	0	3	0	20	0	0	1	0	27
168T	Her2	3	2	2	0	18	0	0	0	0	25
5T	Luminal A	4	2	5	2	12	0	0	0	0	25
11T	Luminal A	2	1	0	2	18	1	0	0	0	24
Total samples, 15; total number of genes, 505. Frame_Shift_Del: 36 (Total); 2.4 (Mean); 3 (Median). Frame_Shift_Ins: 12 (Total); 0.8 (Mean); 1 (Median). In_Frame_Del: 44 (Total); 2.933 (Mean); 2 (Median). In_Frame_Ins : 32 (Total); 2.133 (Mean); 2 (Median). Missense_Mutation : 442 (Total); 29.467 (Mean); 30 (Median). Nonsense_Mutation: 14 (Total); 0.933 (Mean); 1 (Median). Nonstop_Mutation: 2 (To…
